# Supplementary material for: The effect of brewery spent grain application on biogas yields and kinetics in co-digestion with sewage sludge
Source: PeerJ. 2020 Dec 22;8:e10590. doi: 10.7717/peerj.10590 (PMC7761201; doi:10.7717/peerj.10590)
Supplement: Supplemental Information 1 [file peerj-08-10590-s001.xlsx]

## Sheet: energy balance
		Parameter	Unit	R1	R2	R3	R4		digester diameter	D=	15	m
		Input data							digester volume	V=	2500	m3
		VS	g kg–1	26.87	34.8269	29.6517	35.9346		sludge volume	for HRT = 20d	125	m3/d
		Feedstock density	kg m–3	1000.5	992.7	1006.41	1002.14			for HRT = 18d	138.889	m3/d
		VS load	kg d–1	3360.43	4321.59	3730.22	5005.58
		Methane yield	m3 CH4 kg–1 smodop	0.21	0.211692	0.285572	0.270945
		Daily methane production	m3 CH4 d–1	705.69	914.847	1065.25	1356.24
		Feedstock temperature in winter	○C	8	8	8	8
		Feedstock flow rate	m3 d-1	125	125	125	139
		Energy balance
		Theoretical thermal energy	MJ d-1	25263.7	32751.5	38135.8	48553.2		35.8	Mj Nm-3
		Thermal energy for heating the feedstock	MJ d–1	14175	14175	14175	15762.6		4200	kJ m-3K-1
		Thermal energy for covering the heat loss	MJ d–1	3765.96	3765.96	3765.96	3765.96		4	kJm-2h-1K-1	713.25	m2
		Thermal energy demand	MJ d–1	19735.1	19735.1	19735.1	21481.4		1.1
		Profit of thermal energy	%	28.0144	65.9561	93.239	126.024
		Net thermal energy profit*	%	37.9418		32.7854
		Daily energy production	kWh d-1	7056.9	9148.47	10652.5	13562.4		10	kWh Nm-3
		Energy production	kWh t-1	56.4552	73.1878	85.2197	97.5709
		Theoretical thermal power production	kW	126.436	163.91	190.857	242.992		0.43		238.17	308.761	70.5906
		Theoretical thermal power production	kW	111.734	144.851	168.664	214.737		0.38		359.521	457.73	98.2089
		Profit of theoretic thermal and electric power production	%	29.6387		27.3166
		*Difference of thermal energy demand between the control and co-digestion run

## Sheet: R1,2
			feedstock																		digestate
			R1			ss	2	l	HRT = 20 d					loads							R1																									biogas
		data	VFA	SCOD	COD	density	pH	ALK	TOC	TS	TS	VS	VS	L SCOD	L TS	L VS		OLR			VFA	SCOD	SCOD	COD	ηCOD	density	ph	ALK	TOC	TS	TS	VS	VS	L SCOD	L TS	L VS	LVS	L VS	L SOCD	hVS	hTS	biogas	biogas	methane	methane	for VS	for TS	for COD	for VS
			mg/l	mg/l	g/l	g/cm3	pH	mgCaCO3/l	mg/l	%	g/kg	%	g/kg	g/d	g/d	g/d					mg/l	mg/l		g/l		g/cm3	pH	mgCaCO3/l	mg/l	%	g/kg	%	g/kg	g/d	g/d	g/d	g/d	g/d	g/d	-	-	l/d	l/d	l/d	l/d
		18-02-2014	460.5	2867	43.325	1.017	6.54	750	407.8	4.17263	41.7263	77.6513	32.401	86.65	84.8712	65.9036		1.64759		10-03-2014	456	3191.67	-11.3243	23.0667	46.759	0.97	7.54	3150	827.7	2.03921	20.3921	66.7322	13.6081	46.1333	39.5608	26.3998	45.3105	39.5039	40.5167	0.599419	0.533873	16.5906	16.5906	8.88013	8.88013	0.419975	0.366154	0.409477	0.251741
		19-02-2014																		11-03-2014																						20.339		10.7782
		20-02-2014																		12-03-2014																						22.0676		11.8247
		21-02-2014	460.5	2867	43.325	1.017	6.54	750	407.8	4.17263	41.7263	77.6513	32.401	86.65	84.8712	65.9036		1.64759		13-03-2014	413.333	2973.33	-3.70887	22.5	48.0669	0.974	7.37	3250	285.3	2.14296	21.4296	68.8822	14.7612	45	41.7448	28.7547	43.1264	37.1489	41.65	0.563685	0.508139	23.8532	23.8532	12.8745	12.8745	0.642097	0.5531	0.572706	0.361941
		22-02-2014																		14-03-2014
		23-02-2014																		15-03-2014
		24-02-2014																		16-03-2014
		25-02-2014	511.75	2670.5	41.775	1.0145	6.57	800	527.5	3.33261	33.3261	76.4996	25.4943	83.55	67.6187	51.728		1.2932		17-03-2014	431	2660.33	0.380703	26.7	36.0862	0.9705	7.37	3250	161.8	2.15707	21.5707	68.9176	14.866	53.4	41.8687	28.8549	25.75	22.8731	30.15	0.44218	0.380812	23.8889	23.8889	13.0512	13.0512	1.04441	0.927725	0.792336	0.461818
		26-02-2014																		18-03-2014																						19.6402		10.812
		27-02-2014																		19-03-2014																						17.5598		9.59871
		28-02-2014	511.75	2670.5	41.775	1.0145	6.57	800	527.5	3.33261	33.3261	76.4996	25.4943	83.55	67.6187	51.728		1.2932		20-03-2014	393.333	2554.33	4.35	25.2667	39.5173	0.974	7.35	3350	320.3	2.04354	20.4354	66.8837	13.6679	50.5333	39.8081	26.6251	27.8106	25.1029	33.0167	0.485286	0.411286	16.4829	16.4829	9.03229	9.03229	0.656613	0.592683	0.499229	0.318645
		01-03-2014																		21-03-2014
		02-03-2014																		22-03-2014
		03-03-2014																		23-03-2014
		04-03-2014	292.333	1309.33	33.1667	0.977	6.64	500	228.8	2.86511	28.6511	78.6084	22.5222	66.3333	55.9843	44.0084		1.10021		24-03-2014	354.667	2343.67		25.7	22.5126	0.9685	7.43	3250	252.8	2.07471	20.7471	67.2156	13.9453	51.4	40.1872	27.0121	15.7971	16.9963		0.386206	0.28217	16.1383	16.1383	8.72532	8.72532	0.949516	1.0216		0.366709
		05-03-2014																		25-03-2014																						16.2148		8.77447
		06-03-2014																		26-03-2014																						17.0256		9.1996
		07-03-2014	292.333	1309.33	33.1667	0.977	6.64	500	228.8	2.86511	28.6511	78.6084	22.5222	66.3333	55.9843	44.0084		1.10021		27-03-2014	347	2116		29.2	11.9598	0.979	7.46	3200	208.1	2.35862	23.5862	53.8103	12.6918	58.4	46.1818	24.8506	9.80253	19.1578		0.435322	0.175094	17.9086	17.9086	9.63449	9.63449	0.934795	1.82694		0.406937
		08-03-2014																		28-03-2014																						18.2265		9.73477
		09-03-2014																		29-03-2014
		10-03-2014																		30-03-2014
		11-03-2014	400.667	1695.33	39.4333	0.9855	6.72	675	300.2	3.41711	34.1711	79.4527	27.1499	78.8667	67.3512	53.5124		1.33781		31-03-2014	355.667	2115	-24.7542	20.4	48.2671	0.9655	7.34	3175	380.6	2.25216	22.5216	63.9125	14.3941	40.8	43.4892	27.795	23.8621	25.7174	38.0667	0.480587	0.354293	18.715	18.715	10.0166	10.0166	0.727718	0.784298	0.491637	0.349732
		12-03-2014																		01-04-2014
		13-03-2014																		02-04-2014																						21.1928		11.4625
		14-03-2014	400.667	1695.33	39.4333	0.9855	6.72	675	300.2	3.41711	34.1711	79.4527	27.1499	78.8667	67.3512	53.5124		1.33781		03-04-2014	372.667	1579.33	6.84231	26.7	32.2908	0.9765	7.62	3150	287.3	2.46959	24.6959	68.3883	16.8891	53.4	48.2311	32.9844	19.1202	20.5279	25.4667	0.383611	0.283887	20.9638	20.9638	11.2657	11.2657	1.02123	1.09642	0.823185	0.391756
		15-03-2014																		04-04-2014																						20.9183		11.2396
		16-03-2014																		05-04-2014
		17-03-2014																		06-04-2014
		18-03-2014																		07-04-2014																						21.7259	21.7259	11.8675	11.8675
		19-03-2014																		08-04-2014																						23.0204		12.4
		20-03-2014																		09-04-2014																						23.5327		12.7773
		21-03-2014																		10-04-2014																						24.6537	24.6537	13.2975	13.2975
		22-03-2014																		11-04-2014																						24.8223		13.5264
		23-03-2014																		12-04-2014
		24-03-2014																		13-04-2014
		25-03-2014	796.667	2194.67	38.2	1.0085	6.7	950	466.9	3.78334	37.8334	70.8502	26.8051	76.4	76.31	54.0658				14-04-2014	443	2673.67	-21.8256	27.5667	27.836	0.9535	7.52	3150	228.1	2.3271	23.271	65.3013	15.1963	55.1333	44.3779	28.9793	31.9321	25.0865	21.2667	0.463999	0.418453	26.7679	26.7679	14.4504	14.4504	1.06703	0.838275		0.495099
		26-03-2014																		15-04-2014																						25.4264		13.5576
		27-03-2014																		16-04-2014																						26.7198		14.7221
		28-03-2014	796.667	2194.67	38.2	1.0085	6.7	950	466.9	3.78334	37.8334	70.8502	26.8051	76.4	76.31	54.0658		1.35164		17-04-2014	424	2552.33	-16.2971	27.9	26.9634	0.991	7.56	3250	193.2	2.45575	24.5575	67.3882	16.5488	55.8	48.6729	32.7998	27.6371	21.266	20.6	0.393336	0.362169	28.2653	28.2653	15.7876	15.7876	1.32913	1.02273		0.522794
		29-03-2014
		30-03-2014
		31-03-2014
		avg	492.383	2147.37	39.18	1.0005	6.634	735	386.24	3.51416	35.1416	76.6125	26.8745	78.36	70.4271	53.8436	#DIV/0!	1.34547			399.067	2475.97	-8.29213	25.5	34.0259	0.97225	7.456	3217.5	314.52	2.23207	22.3207	65.7432	14.6569	51	43.4122	28.5056	27.0149	25.3381	31.3417	0.463363	0.371018	21.2562	21.3295	11.5112	11.5736	0.879251	0.902993	0.598095	0.392717
		SD	177.896	614.711	3.6848	0.0170587	0.074117	155.991	114.616	0.464202	4.64202	3.20924	3.38198	7.3696	10.2109	7.40586	#DIV/0!	0.196367			39.8778	462.599	12.0269	2.74118	12.0516	0.00966451	0.0994652	64.6035	191.483	0.164304	1.64304	4.47238	1.30906	5.48236	3.38119	2.64521	11.1329	7.40872	8.37768	0.0728817	0.107249	3.64461	4.1928	2.02896	2.35627	0.265166	0.400735	0.170719	0.0824705
		u	110.259	380.995	2.28382	0.0105729	0.0459374	96.6827	71.0383	0.28771	2.8771	1.98907	2.09614	4.56764	6.32868	4.59011	#DIV/0!	0.121707			24.7161	286.716	8.33408	1.69897	7.46952	0.00599002	0.0616481	40.0409	118.681	0.101835	1.01835	2.77196	0.811349	3.39794	2.09564	1.63949	6.90014	4.59189	5.19244	0.0451717	0.0664725	2.25891	2.59868	1.25754	1.46041	0.164348	0.248374	0.136601	0.0511148
		max	602.643	2528.36	41.4638	1.01107	6.67994	831.683	457.278	3.80187	38.0187	78.6015	28.9706	82.9276	76.7558	58.4338					423.783	2762.68		27.199		0.97824	7.51765	3257.54	433.201	2.33391	23.3391	68.5152	15.4682	54.3979	45.5079	30.1451	33.915	29.93	36.5341	0.508535	0.43749	23.5151	23.9282	12.7687	13.034	1.0436	1.15137	0.734696	0.443832
		min	382.124	1766.37	36.8962	0.989927	6.58806	638.317	315.202	3.22645	32.2645	74.6234	24.7784	73.7924	64.0984	49.2535					374.351	2189.25		23.801		0.96626	7.39435	3177.46	195.839	2.13024	21.3024	62.9712	13.8455	47.6021	41.3166	26.8661	20.1147	20.7462	26.1492	0.418191	0.304545	18.9973	18.7308	10.2537	10.1132	0.714903	0.654619	0.461494	0.341602
			Feedstock			SS	2	l	HRT = 20 d												digestate
			R2			BSG	20	g													R2																									Biogaz
		data	VFA	SCOD	COD	density	pH	ALK	TOC	TS	TS	VS	VS	L SCOD	L TS	L VS		OLR			VFA	SCOD	SCOD	COD	ηCOD	density	ph	ALK	TOC	TS	TS	VS	VS	L SCOD	L TS	L VS	LVS	L VS	L SOCD	hVS	hTS	biogas	biogas	methane	methane	for VS	for TS	for COD	for VS
			mg/l	mg/l	g/l	g/cm3	pH	mgCaCO3/l	mg/l	%	g/kg	%	g/kg	g/d	g/d	g/d					mg/l	mg/l		g/l		g/cm3	pH	mgCaCO3/l	mg/l	%	g/kg	%	g/kg	g/d	g/d	g/d	g/d	g/d	g/d	-	-	l/d	l/d	l/d	l/d
		18-02-2014	550.75	3070	49.975	1.0195	6.63	825	945	4.36958	43.6958	80.5552	35.1992	99.95	89.0956	71.7712		1.79428		10-03-2014	324.667	3322	-8.20847	28.6333	42.7047	0.971	7.76	3175	930.7	2.5657	25.657	73.5439	18.8692	57.2667	49.8259	36.6439	39.2697	35.1273	42.6833	0.489434	0.440759	23.7701	23.7701	12.5958	12.5958	0.676686	0.605305	0.556895	0.331193
		19-02-2014																		11-03-2014																						27.842		14.1852
		20-02-2014																		12-03-2014																						29.0173		14.9785
		21-02-2014	550.75	3070	49.975	1.0195	6.63	825	945	4.36958	43.6958	80.5552	35.1992	99.95	89.0956	71.7712		1.79428		13-03-2014	376	2369	22.8339	26.9333	46.1064	0.967	7.85	2800	370.2	2.67068	26.7068	74.5517	19.9104	53.8667	51.6509	38.5067	37.4447	33.2646	46.0833	0.46348	0.420275	29.7113	29.7113	15.3694	15.3694	0.893182	0.793472	0.64473	0.413973
		22-02-2014																		14-03-2014
		23-02-2014																		15-03-2014
		24-02-2014																		16-03-2014
		25-02-2014	572.75	2728.75	56.05	1.021	6.73	750	835.1	4.12042	41.2042	80.468	33.1562	112.1	84.139	67.705		1.69263		17-03-2014	499.667	3339	-22.3637	27.9	50.223	0.9535	7.57	3375	288.7	2.67882	26.7882	73.7878	19.7664	55.8	51.0851	37.6946	33.0539	30.0104	56.3	0.443253	0.392848	30.7333	30.7333	16.2109	16.2109	1.02409	0.929792	0.545884	0.453929
		26-02-2014																		18-03-2014																						27.3055		14.431
		27-02-2014																		19-03-2014																						25.1449		13.2808
		28-02-2014	572.75	2728.75	56.05	1.021	6.73	750	835.1	4.12042	41.2042	80.468	33.1562	112.1	84.139	67.705		1.69263		20-03-2014	408	2709.33	0.711559	25.8	53.9697	0.918	7.91	3825	667.5	2.62368	26.2368	73.5849	19.3063	51.6	48.1707	35.4464	35.9683	32.2586	60.5	0.476458	0.427486	24.7796	24.7796	13.0286	13.0286	0.768154	0.688929	0.40958	0.365993
		01-03-2014																		21-03-2014
		02-03-2014																		22-03-2014
		03-03-2014																		23-03-2014
		04-03-2014	1086.67	4318.33	52.1	0.983	6.33	750	1289	4.11366	41.1366	83.9936	34.5521	104.2	80.8745	67.9294		1.69824		24-03-2014	393	2888	33.1223	24.8333	52.3353	0.9515	7.51	3400	379.4	2.53383	25.3383	72.617	18.3999	49.6667	48.2188	35.015	32.6557	32.9144	54.5333	0.484538	0.403783	24.0741	24.0741	12.4485	12.4485	0.731415	0.737208	0.441456	0.354398
		05-03-2014																		25-03-2014																						23.4849		12.1546
		06-03-2014																		26-03-2014																						24.7681		12.8279
		07-03-2014	1086.67	4318.33	52.1	0.983	6.33	750	1289	4.11366	41.1366	83.9936	34.5521	104.2	80.8745	67.9294		1.69824		27-03-2014	403.333	2217	48.6607	33.5333	35.6366	0.967	8	3300	309.6	2.6277	26.277	77.5726	20.3838	67.0667	50.8198	39.4222	30.0547	28.5072	37.1333	0.419659	0.371622	25.3862	25.3862	13.0483	13.0483	0.890519	0.844667	0.683651	0.373715
		08-03-2014																		28-03-2014																						25.4564		13.067
		09-03-2014																		29-03-2014
		10-03-2014																		30-03-2014
		11-03-2014	479	2239	48.7333	0.973	6.67	600	767	4.4739	44.739	84.118	37.6336	97.4667	87.0621	73.2349		1.83087		31-03-2014	363.667	2304.67	-2.93286	25.8333	46.9904	0.97	7.39	3075	281.8	2.75425	27.5425	68.3624	18.8287	51.6667	53.4324	36.5276	33.6298	36.7073	45.8	0.501226	0.386273	25.6509	25.6509	13.1781	13.1781	0.698795	0.762743	0.560063	0.350255
		12-03-2014																		01-04-2014
		13-03-2014																		02-04-2014																						28.2837		14.7216
		14-03-2014	479	2239	48.7333	0.973	6.67	600	767	4.4739	44.739	84.118	37.6336	97.4667	87.0621	73.2349		1.83087		03-04-2014	431.667	1319.33	41.0749	26.0333	46.58	0.9415	7.62	3300	478.5	2.87611	28.7611	73.033	21.0051	52.0667	54.1571	39.5526	32.905	33.6823	45.4	0.459922	0.377948	28.0112	28.0112	14.598	14.598	0.83163	0.851276	0.616987	0.382484
		15-03-2014																		04-04-2014																						28.3611		14.6803
		16-03-2014																		05-04-2014
		17-03-2014																		06-04-2014
		18-03-2014																		07-04-2014
		19-03-2014																		08-04-2014																						30.5773		15.9008
		20-03-2014																		09-04-2014																						30.9097		16.1373
		21-03-2014																		10-04-2014
		22-03-2014																		11-04-2014																						31.9506		16.7536
		23-03-2014																		12-04-2014
		24-03-2014																		13-04-2014
		25-03-2014	809.333	2043	45.1	0.967	6.64	1000	623.2	4.43262	44.3262	75.7871	33.5936	90.2	85.727	64.9699		1.62425		14-04-2014	528.667	3176.33	-55.474	30.1333	33.1855	0.9605	8.05	3325	248	3.11231	31.1231	71.6275	22.2927	60.2667	59.7876	42.8243	25.9394	22.1456	29.9333	0.34086	0.302581	32.4847	32.4847	17.1483	17.1483	1.46687	1.25233		0.499995
		26-03-2014																		15-04-2014																						31.408		16.5514
		27-03-2014																		16-04-2014																						32.2674		17.1033
		28-03-2014	809.333	2043	45.1	0.967	6.64	1000	623.2	4.43262	44.3262	75.7871	33.5936	90.2	85.727	64.9699		1.62425		17-04-2014	520.333	3482	-70.4356	31.7	29.7118	0.9685	7.98	3350	221.4	3.09818	30.9818	72.3332	22.4101	63.4	60.0117	43.4084	25.7153	21.5616	26.8	0.33187	0.299967	33.842	33.842	17.9873	17.9873	1.56955	1.31603		0.520886
		29-03-2014
		30-03-2014
		31-03-2014
		avg	699.7	2879.82	50.3917	0.9927	6.6	785	891.86	4.30204	43.0204	80.9844	34.8269	100.783	85.3796	69.1221	#DIV/0!	1.72805			424.9	2712.67	-1.30112	28.1333	43.7443	0.95685	7.764	3292.5	417.58	2.75413	27.5413	73.1014	20.1173	56.2667	52.716	38.5042	32.6636	30.6179	44.5167	0.44107	0.382354	28.1342	27.8443	14.6828	14.5613	0.955088	0.878175	0.557406	0.404682
		SD	235.123	848.427	3.82566	0.024321	0.146969	137.032	236.424	0.163042	1.63042	3.20895	1.66024	7.65132	2.92861	3.14833	#DIV/0!	0.0787083			69.4955	672.708	39.8214	2.86085	8.298	0.01671	0.229889	260.355	222.889	0.208491	2.08491	2.32034	1.40791	5.72169	4.24854	2.87138	4.45801	5.16824	10.9745	0.0599881	0.0480238	3.14837	3.65792	1.73053	2.01893	0.315463	0.232584	0.0945289	0.065777
		u	145.728	525.851	2.37113	0.015074	0.0910909	84.9318	146.535	0.101053	1.01053	1.98889	1.02901	4.74225	1.81514	1.95132	#DIV/0!	0.048783			43.073	416.941	24.6811	1.77314	5.14306	0.0103568	0.142484	161.367	138.146	0.129222	1.29222	1.43813	0.872617	3.54628	2.63322	1.77967	2.76305	3.20325	6.80194	0.0371804	0.0297649	1.95134	2.26716	1.07258	1.25132	0.195522	0.144154	0.065504	0.0407683
		max	845.428	3405.67	52.7628	1.00777	6.69109	869.932	1038.39	4.40309	44.0309	82.9733	35.8559	105.526	87.1948	71.0734	#DIV/0!	1.77684			467.973	3129.61		29.9065		0.967207	7.90648	3453.87	555.726	2.88335	28.8335	74.5395	20.9899	59.8129	55.3492	40.2838	35.4267	33.8212	51.3186	0.47825	0.412119	30.0855	30.1115	15.7553	15.8126	1.15061	1.02233	0.62291	0.44545
		min	553.972	2353.97	48.0205	0.977626	6.50891	700.068	745.325	4.20098	42.0098	78.9955	33.7979	96.0411	83.5645	67.1708	#DIV/0!	1.67927			381.827	2295.73		26.3602		0.946493	7.62152	3131.13	279.434	2.6249	26.249	71.6633	19.2446	52.7204	50.0828	36.7245	29.9006	27.4147	37.7147	0.40389	0.352589	26.1828	25.5772	13.6102	13.31	0.759566	0.73402	0.491902	0.363914
[truncated: 6 more columns]

## Sheet: R 3,4
	feedstock																					digestate
	R3			SS	2	l	HRT = 20,0 d															R3						2	l/d																		biogas
data	VFA	SCOD	COD	density	pH	ALK	TOC	TS	TS	VS	VS	L SCOD	L TS	L VS		OLR						VFA	SCOD	SCOD	COD	ηCOD	density	ph	ALK	TOC	TS	TS	VS	VS	L SCOD	L TS	L VS	LVS	L VS	L SOCD	hVS	hTS	biogas	biogas	methane	methane	for VS	for TS	for COD
	mg/l	mg/l	g/l	g/cm3	pH	mgCaCO3/l	mg/l	%	g/kg	%	g/kg	g/d	g/d	g/d								mg/l	mg/l		g/l		g/cm3	pH	mgCaCO3/l	mg/l	%	g/kg	%	g/kg	g/d	g/d	g/d	g/d	g/d	g/d	-	-	l/d	l/d	l/d	l/d
26-05-2014																					15-06-2014
27-05-2014	1547	3314.33	44.7	0.9785	5.87	925	963.9	4.07365	40.7365	76.3146	31.0879	89.4	79.7214	60.839		1.52098					16-06-2014	459	2780	16.1219	30.9	30.8725	1.003	7.63	3800	289.8	2.74923	27.4923	64.9564	17.858	61.8	55.1496	35.8232	24.5717	25.0159	27.6	0.411181	0.30822	28.5291	28.5291	16.3697	16.3697	1.14044	1.16106	1.03366
28-05-2014																					17-06-2014																						26.4843		15.1832
29-05-2014																					18-06-2014																						28.3821		16.0064
30-05-2014	1783	3340	44.5	0.9785	5.87	925	963.9	4.07365	40.7365	76.3146	31.0879	89	79.7214	60.839		1.52098					19-06-2014	426.667	2624	21.4371	27.5	38.2022	0.9995	7.74	3800	146.2	2.9839	29.839	70.1499	20.932	55	59.6482	41.8432	20.0731	18.9959	34	0.312232	0.251791	28.4101	28.4101	16.0932	16.0932	1.49559	1.41533	0.835591
31-05-2014																					20-06-2014
01-06-2014																					21-06-2014
02-06-2014																					22-06-2014
03-06-2014	1783	3340.33	44.5	1.0215	5.88	875	1008	3.48017	34.8017	70.4963	24.5339	89	71.0998	50.1228		1.25307					23-06-2014	448	2838.33	15.0284	27.3	38.6517	0.9955	7.62	3875	943	2.86542	28.6542	64.7324	18.5486	54.6	57.0506	36.9302	14.0492	13.1925	34.4	0.263204	0.197599	32.0649	32.0649	18.1112	18.1112	2.43054	2.28232	0.932119
04-06-2014																					24-06-2014																						30.2864		17.1127
05-06-2014																					25-06-2014																						31.1691		17.6084
06-06-2014	570	3759	45.6	1.0215	5.88	875	1008	3.48017	34.8017	70.4963	24.5339	91.2	71.0998	50.1228		1.25307					26-06-2014	510.333	2828.67	24.7495	26.7333	41.3743	0.9825	7.74	3900	201.3	2.73299	27.3299	65	17.7644	53.4667	53.7033	34.9071	17.3965	15.2156	37.7333	0.303568	0.244678	31.2995	31.2995	17.7584	17.7584	2.05706	1.79918	0.829493
07-06-2014																					27-06-2014																						23.757		13.5724
08-06-2014																					28-06-2014
09-06-2014																					29-06-2014
10-06-2014	571	3758.67	45.6333	1.008	5.97	1000	1185	4.20867	42.0867	75.7213	31.8686	91.2667	84.8469	64.2471		1.60618					30-06-2014	447	2586.33	31.1901	22.1	51.5705	0.999	7.36	3750	265.5	2.62363	26.2363	64.3365	16.8795	44.2	52.4201	33.7253	32.4267	30.5218	47.0667	0.47507	0.38218	31.7073	31.7073	17.8928	17.8928	1.03884	0.977814	0.673668
11-06-2014																					01-07-2014																						27.8123		16.0127
12-06-2014																					02-07-2014																						30.4007		17.2618
13-06-2014	2053	3957	51.5	1.008	5.97	1000	1185	4.20867	42.0867	75.7213	31.8686	103	84.8469	64.2471		1.60618					03-07-2014	432.333	2458	37.8822	30.5	40.7767	0.995	7.26	3800	253.1	2.84668	28.4668	66.2341	18.8547	61	56.6488	37.5209	28.198	26.7262	42	0.415991	0.33234	31.7073	31.7073	17.8928	17.8928	1.18637	1.12445	0.754936
14-06-2014																					04-07-2014																						32.1078		18.1486
15-06-2014																					05-07-2014
16-06-2014																					06-07-2014
17-06-2014	2052.33	3958	51.6	1.0165	5.76	1000	1280	4.09108	40.9108	68.6994	28.1055	103.2	83.1717	57.1385		1.42846					07-07-2014	451.333	2842.33	28.1876	30.5	40.8915	0.979	7.17	3850	277.4	3.03724	30.3724	66.1626	20.0952	61	59.4692	39.3464	23.7025	17.792	42.2	0.311385	0.284982	32.6866	32.6866	18.7853	18.7853	1.83715	1.37904	0.774564
18-06-2014																					08-07-2014																						30.4639		17.362
19-06-2014																					09-07-2014																						28.9017		16.6442
20-06-2014	2180	4355	46	1.0165	5.76	1000	1280	4.09108	40.9108	68.6994	28.1055	92	83.1717	57.1385		1.42846					10-07-2014	458.667	2820.33	35.2392	28.4	38.2609	0.9985	7.08	3850	233.3	3.06377	30.6377	66.6729	20.427	56.8	61.1835	40.7928	21.9882	16.3457	35.2	0.286071	0.264371	29.0901	29.0901	16.8254	16.8254	1.77968	1.32299	0.826424
21-06-2014																					11-07-2014																						27.1889		15.6374
22-06-2014																					12-07-2014
23-06-2014																					13-07-2014
24-06-2014	2180.67	4352	45.9333	1.0125	5.58	875	1536	4.08893	40.8893	73.9851	30.252	91.8667	82.8009	61.2603		1.53151					14-07-2014	423	2630.67	39.5527	31.9667	30.4064	0.9995	7.1	3850	231.1	3.03959	30.3959	64.8548	19.7132	63.9333	60.7613	39.4067	22.0395	21.8536	27.9333	0.356734	0.266175	29.1995	29.1995	16.6433	16.6433	1.33614	1.32487	1.04533
25-06-2014																					15-07-2014																						28.3791		16.1756
26-06-2014																					16-07-2014																						29.0315		16.5475
27-06-2014	1977	3834	58.3	1.0125	5.58	875	1536	4.08893	40.8893	73.9851	30.252	116.6	82.8009	61.2603		1.53151					17-07-2014	431	2535.67	33.8637	29.6	49.2281	0.9965	7.11	3800	222.9	2.75183	27.5183	64.8548	17.8469	59.2	54.8439	35.5689	27.9569	25.6914	57.4	0.41938	0.337641	24.4604	24.4604	13.9421	13.9421	0.952088	0.874933	0.42614
28-06-2014																					18-07-2014																						25.1308		14.3241
29-06-2014																					19-07-2014																						25.6581		14.6247
30-06-2014																					20-07-2014																						24.8298		14.1526
01-07-2014	1976	3833.33	58.3333	0.9965	6.09	900	1239	4.79467	47.9467	71.8979	34.4727	116.667	95.5578	68.7041		1.7176					21-07-2014	412.333	2553.67	33.3826	31.1	46.6857	1	7.11	3800	222.9	2.79584	27.9584	64.7082	18.0914	62.2	55.9168	36.1828	39.641	32.5214	54.4667	0.473354	0.414838	25.6227	25.6227	14.6045	14.6045	0.787874	0.646369	0.470429
avg	1697.55	3800.15	48.7818	1.00641	5.83727	931.818	1198.62	4.06179	40.6179	72.9392	29.6517	97.5636	81.7126	59.629		1.49073					avg	445.424	2681.64	28.785	28.7818	40.6291	0.9948	7.381	3827.5	298.773	2.86274	28.6274	65.6966	18.8192	57.5636	56.9814	37.4589	24.7312	22.1702	40	0.366197	0.298619	28.6949	29.5252	16.3442	16.8108	1.45834	1.30076	0.782033
SD	587.516	364.248	5.35141	0.0154739	0.157866	57.1083	206.339	0.355008	3.55008	2.99041	3.08355	10.7028	6.71682	5.71319		0.14283					sd	26.3553	142.691	8.44574	2.81789	6.67899	0.00756096	0.273177	43.3013	217.237	0.148578	1.48578	1.65825	1.29711	5.63579	2.93208	2.57496	7.13723	6.40613	9.82713	0.0759102	0.0640003	2.60168	2.6931	1.44297	1.50546	0.512204	0.446842	0.199637
u	347.194	215.253	3.16243	0.00914431	0.0932914	33.7483	121.936	0.209793	2.09793	1.76719	1.82223	6.32485	3.96932	3.37622		0.0844054					u	15.5747	84.3234	4.99102	1.66524	3.94696	0.00446816	0.161434	25.5889	128.376	0.0878025	0.878025	0.979946	0.766529	3.33048	1.73272	1.52167	4.21776	3.78571	5.80735	0.0448592	0.037821	1.53747	1.59149	0.852723	0.889652	0.302688	0.264062	0.117976
max	2044.74	4015.4	51.9442	1.01555	5.93056	965.566	1320.55	4.27158	42.7158	74.7064	31.4739	103.888	85.682	63.0053		1.57513					max	460.999	2765.96		30.4471		0.999268	7.54243	3853.09	427.149	2.95054	29.5054	66.6765	19.5857	60.8941	58.7141	38.9805	28.949	25.9559	45.8074	0.411056	0.336441	30.2323	31.1167	17.1969	17.7004	1.76103	1.56482	0.900008
min	1350.35	3584.9	45.6194	0.997265	5.74398	898.07	1076.68	3.852	38.52	71.172	27.8295	91.2388	77.7433	56.2528		1.40632					min	429.85	2597.31		27.1166		0.990332	7.21957	3801.91	170.396	2.77494	27.7494	64.7167	18.0527	54.2332	55.2487	35.9372	20.5135	18.3845	34.1926	0.321338	0.260798	27.1574	27.9338	15.4915	15.9211	1.15566	1.0367	0.664057
	wsad			SS	2.2	l			HRT													digestate
	R4			BSG	22	g	2.2	l/d	18	d												R4						2.2	l/d																		Biogaz
data	VFA	SCOD	COD	density	pH	ALK	TOC	TS	TS	VS	VS	L SCOD	L TS	L VS		OLR						VFA	SCOD	η	COD	η	density	ph	ALK	TOC	TS	TS	VS	VS	L SCOD	L TS	L VS	L TS	L VS	L SCOD	hVS	hTS	Biogaz	Biogaz	Metan	Metan	na kg VS	na kg TS	na kg ChZT
	mg/l	mg/l	g/l	g/cm3	pH	mgCaCO3/l	mg/l	%	g/kg	%	g/kg	g/d	g/d	g/d								mg/l	mg/l		g/l		g/cm3	pH	mgCaCO3/l	mg/l	%	g/kg	%	g/kg	g/d	g/d	g/d	g/d	g/d	g/d	-	-	l/d	l/d	l/d	l/d
26-05-2014																					13-06-2014
27-05-2014	1641	3391.67	63.7667	0.976	5.49	850	1071	3.69158	36.9158	75.1818	27.754	140.287	79.2656	59.5933		1.48983					14-06-2014	631	3837.67	-13.1499	30.0667	52.8489	0.9979	7.7	3575	469.6	3.15133	31.5133	60.7806	19.154	66.1467	69.1836	42.0502	10.082	17.5431	74.14	0.29438	0.127192	38.1303	38.1303	20.8828	20.8828	2.17353	3.78203	0.514302
28-05-2014																					15-06-2014																						36.2437		19.7992
29-05-2014																					16-06-2014																						37.4614		20.3029
30-05-2014	1641	3391.67	63.7667	0.976	5.49	850	1071	3.69158	36.9158	75.1818	27.754	140.287	79.2656	59.5933		1.48983					17-06-2014	585.667	3749.67	-10.5553	28.4333	55.4104	0.9925	7.6	3550	333.5	3.20324	32.0324	70.9173	22.7165	62.5533	69.9427	49.6014	9.32291	9.99186	77.7333	0.167667	0.117616	38.1599	38.1599	20.6956	20.6956	3.8191	4.09313	0.490908
31-05-2014																					18-06-2014
01-06-2014																					19-06-2014
02-06-2014																					20-06-2014
03-06-2014	1649	3474.33	52.6333	1.0085	5.69	800	1133	4.73796	47.3796	77.3246	36.6361	115.793	105.121	81.2846		2.03211					21-06-2014	609.667	3954.33	-13.8156	37.6	28.5624	0.985	7.42	3600	1324	3.31299	33.1299	71.8153	23.7923	82.72	71.7925	51.558	33.3288	29.7266	33.0733	0.36571	0.317051	38.4	38.4	20.9111	20.9111	1.29177	1.15216	1.16106
04-06-2014																					22-06-2014																						37.2553		20.2553
05-06-2014																					23-06-2014																						38.6028		20.9254
06-06-2014	1649	3474.33	52.6333	1.0085	5.69	800	1133	4.73796	47.3796	77.3246	36.6361	115.793	105.121	81.2846		2.03211					24-06-2014	603.333	3797.67	-9.30634	34	35.4022	0.983	7.52	3450	313.8	3.34864	33.4864	68.1784	22.8304	74.8	72.4176	49.3731	32.7036	31.9114	40.9933	0.392589	0.311104	37.8801	37.8801	20.7223	20.7223	1.18704	1.15829	0.924056
07-06-2014																					25-06-2014																						38.0064		20.8199
08-06-2014																					26-06-2014
09-06-2014																					27-06-2014
10-06-2014	1528.67	3757.67	51.9667	1.013	5.8	950	1480	4.84855	48.4855	78.3105	37.9693	114.327	108.055	84.6183		2.11546					28-06-2014	549.333	3465	7.78852	31.5	39.3842	0.9835	7.31	3450	445.2	3.62169	36.2169	70.2511	25.4427	69.3	78.3624	55.0505	29.6925	29.5678	45.0267	0.349426	0.274791	37.6166	37.6166	20.8114	20.8114	1.27221	1.26687	0.835429
11-06-2014																					29-06-2014																						40.2882		21.9382
12-06-2014																					30-06-2014																						41.2636		22.3892
13-06-2014	1528.67	3757.67	51.9667	1.013	5.8	950	1480	4.84855	48.4855	78.3105	37.9693	114.327	108.055	84.6183		2.11546					01-07-2014	548.333	3326.67	11.4699	33.7	35.1507	0.983	7.21	3400	322.2	3.24971	32.4971	67.2779	21.8634	74.14	70.2782	47.2817	37.7767	37.3366	40.1867	0.441235	0.349606	41.8949	41.2636	22.8696	22.3892	1.10518	1.0923	1.0268
14-06-2014																					02-07-2014
15-06-2014																					03-07-2014
16-06-2014																					04-07-2014
17-06-2014	1842.67	3976.33	54.4	1.013	5.68	900	1450	5.00137	50.0137	74.9305	37.4756	119.68	111.461	83.518		2.08795					05-07-2014	580.333	3827	3.75555	40.0333	26.4093	0.98	7.26	3525	216	3.48747	34.8747	69.3601	24.1891	88.0733	75.1898	52.1518	36.2708	31.3663	31.6067	0.375563	0.325413	43.989	43.989	24.3756	24.3756	1.40243	1.2128	1.39176
18-06-2014																					06-07-2014																						41.4878		22.9075
19-06-2014																					07-07-2014																						39.9718		22.0804
20-06-2014	1842.67	3976.33	54.4	1.013	5.68	900	1450	5.00137	50.0137	74.9305	37.4756	119.68	111.461	83.518		2.08795					08-07-2014	565.667	4053	-1.92807	36.4667	32.9657	0.9845	7.14	3475	207.5	3.60562	36.0562	70.6939	25.4895	80.2267	78.094	55.2077	33.3666	28.3103	39.4533	0.338973	0.299358	39.0314	39.0314	21.6203	21.6203	1.3787	1.16978	0.989307
21-06-2014																					09-07-2014																						39.9334		22.1075
22-06-2014																					10-07-2014
23-06-2014																					11-07-2014
24-06-2014	2051.33	4341.33	52.8	1.005	5.5	800	1417	4.84283	48.4283	78.3454	37.9414	116.16	107.075	83.8883		2.09721					12-07-2014	550	3702.67	14.7113	34.5	34.6591	0.994	7.13	3600	498.1	3.62214	36.2214	66.4862	24.0822	75.9	79.2091	52.6631	27.866	31.2253	40.26	0.372224	0.260247	39.9037	39.9037	21.7607	21.7607	1.27793	1.43199	0.99115
25-06-2014																					13-07-2014																						40.6748		22.1812
26-06-2014																					14-07-2014																						36.4434		19.8737
27-06-2014	2051.33	4341.33	52.8	1.005	5.5	800	1417	4.84283	48.4283	78.3454	37.9414	116.16	107.075	83.8883		2.09721					15-07-2014	548.667	3576.67	17.6136	35.3	33.1439	0.933	7.11	3575	420.2	3.44311	34.4311	68.9733	23.7483	77.66	70.6733	48.7457	36.4017	35.1426	38.5	0.418921	0.339964	35.4787	35.4787	19.3476	19.3476	1.00956	0.974646	0.921526
28-06-2014																					16-07-2014																						35.4926		19.3552
29-06-2014																					17-07-2014																						35.9603		19.6102
30-06-2014																					18-07-2014																						34.2159		18.659
01-07-2014	2157.67	4381	61.6333	0.9925	5.99	850	961.4	5.33278	53.3278	74.4986	39.7284	135.593	116.441	86.747		2.16868					19-07-2014	508	3394.67	22.5139	38.6	37.3716	1	7.11	3575	420.2	3.16815	31.6815	68.3935	21.6681	84.92	69.6993	47.6698	46.7418	39.0772	50.6733	0.450473	0.40142	34.8674	34.8674	19.0142	19.0142	0.89227	0.745957	0.688082
avg	1780.27	3842.15	55.7061	1.00214	5.66455	859.091	1278.49	4.68885	46.8885	76.6077	35.9346	122.553	103.491	79.3229		1.98307					avg	570.909	3698.64	2.64524	34.5636	37.3917	0.983309	7.31909	3525	451.845	3.3831	33.831	68.4661	23.1797	76.04	73.1675	50.123	30.323	29.1999	46.5133	0.360651	0.283978	38.4097	38.611	21.0083	21.1392	1.52816	1.64363	0.903125
sd	222.942	389.289	4.81903	0.0142427	0.161082	58.3874	201.841	0.51984	5.1984	1.64336	4.12681	10.6019	12.4143	9.87063		0.246766					sd	35.1612	232.252	13.1469	3.57561	9.05659	0.0179909	0.211019	69.8212	305.017	0.182823	1.82823	3.01526	1.83165	7.86634	3.83626	3.80464	11.3074	8.49273	15.44	0.0784791	0.0882739	2.38504	2.5226	1.36962	1.4483	0.827987	1.14909	0.266172
u	131.748	230.051	2.84781	0.00841674	0.0951914	34.5041	119.278	0.3072	3.072	0.971145	2.43875	6.26519	7.33623	5.83307		0.145827					u	20.7786	137.25	7.7692	2.11301	5.352	0.0106317	0.124702	41.2609	180.25	0.108039	1.08039	1.78187	1.08242	4.64863	2.26704	2.24835	6.6821	5.01879	9.12429	0.0463773	0.0521656	1.40944	1.49073	0.80938	0.855876	0.4893	0.679058	0.157295
max	1912.02	4072.2	58.5539	1.01055	5.75974	893.595	1397.77	4.99605	49.9605	77.5788	38.3734	128.819	110.827	85.156		2.1289					max	591.688	3835.89		36.6766		0.993941	7.44379	3566.26	632.096	3.49114	34.9114	70.248	24.2621	80.6886	75.4345	52.3714	37.0051	34.2187	55.6376	0.407028	0.336144	39.8192	40.1017	21.8177	21.9951	2.01746	2.32269	1.06042
min	1648.53	3612.1	52.8582	0.99372	5.56935	824.587	1159.21	4.38165	43.8165	75.6365	33.4959	116.288	96.1543	73.4898		1.83725					min	550.131	3561.39		32.4506		0.972677	7.19439	3483.74	271.595	3.27506	32.7506	66.6843	22.0973	71.3914	70.9005	47.8746	23.6409	24.1811	37.389	0.314274	0.231813	37.0003	37.1202	20.1989	20.2833	1.03886	0.964574	0.74583
[truncated: 7 more columns]

## Sheet: kinetics
						Parametr	Unit	R1	R2	R3	R4
						Constant of biogas production rate k	h-1	0.076	0.0597419	0.078	0.0510412
						Maximum biogas production Vmax	L	24.32	36.2897	33.12	54.8253
						Coefficient of determination R2	-	0.99925	0.99968	0.99968	0.9999
	R1		V		R2				R3				R4
	0	0	0	24.32	0	0	0	36.2897	0	0	0	33.12	0	0	0	54.8253
	1	1.58876	1.77983	24.32	1	2.07841	2.10453	36.2897	1	2.63653	2.48518	33.12	1	2.77089	2.72813	54.8253
	2	3.37628	3.42941	24.32	2	4.02868	4.087	36.2897	2	4.88144	4.78388	33.12	2	5.22317	5.32051	54.8253
	3	5.04424	4.95826	24.32	3	5.95903	5.95452	36.2897	3	6.96172	6.9101	33.12	3	7.54114	7.7839	54.8253
	4	6.59714	6.37522	24.32	4	7.8295	7.71372	36.2897	4	8.94814	8.87677	33.12	4	9.81345	10.1247	54.8253
	5	8.00119	7.68849	24.32	5	9.61271	9.37091	36.2897	5	10.8293	10.6959	33.12	5	12.0316	12.349	54.8253
	6	9.24273	8.90565	24.32	6	11.2451	10.932	36.2897	6	12.5898	12.3785	33.12	6	14.2059	14.4627	54.8253
	7	10.3183	10.0337	24.32	7	12.7123	12.4025	36.2897	7	14.1889	13.9348	33.12	7	16.3206	16.4711	54.8253
	8	11.2944	11.0793	24.32	8	14.0437	13.7878	36.2897	8	15.6192	15.3744	33.12	8	18.3592	18.3796	54.8253
	9	12.1808	12.0483	24.32	9	15.2682	15.0928	36.2897	9	16.9015	16.706	33.12	9	20.2977	20.1932	54.8253
	10	12.9743	12.9464	24.32	10	16.3935	16.322	36.2897	10	18.0241	17.9376	33.12	10	22.1074	21.9165	54.8253
	11	13.6993	13.7787	24.32	11	17.4385	17.48	36.2897	11	19.0374	19.0768	33.12	11	23.7969	23.5541	54.8253
	12	14.3701	14.5502	24.32	12	18.4354	18.5708	36.2897	12	19.9781	20.1306	33.12	12	25.3678	25.1101	54.8253
	13	15.0132	15.2652	24.32	13	19.3877	19.5984	36.2897	13	20.8712	21.1052	33.12	13	26.8215	26.5888	54.8253
	14	15.6302	15.9278	24.32	14	20.3094	20.5663	36.2897	14	21.7254	22.0068	33.12	14	28.164	27.9938	54.8253
	15	16.2317	16.542	24.32	15	21.2004	21.4782	36.2897	15	22.5382	22.8406	33.12	15	29.4264	29.329	54.8253
	16	16.8099	17.1112	24.32	16	22.0624	22.3371	36.2897	16	23.3172	23.612	33.12	16	30.628	30.5977	54.8253
	17	17.3708	17.6388	24.32	17	22.8964	23.1463	36.2897	17	24.0579	24.3254	33.12	17	31.7742	31.8033	54.8253
	18	17.9117	18.1277	24.32	18	23.6992	23.9085	36.2897	18	24.764	24.9853	33.12	18	32.8741	32.9489	54.8253
	19	18.4343	18.5809	24.32	19	24.4769	24.6265	36.2897	19	25.4455	25.5957	33.12	19	33.9333	34.0374	54.8253
	20	18.9484	19.0009	24.32	20	25.2334	25.3029	36.2897	20	26.0973	26.1603	33.12	20	34.9598	35.0719	54.8253
	21	19.4466	19.3902	24.32	21	25.9602	25.94	36.2897	21	26.7268	26.6825	33.12	21	35.9513	36.0548	54.8253
	22	19.9278	19.751	24.32	22	26.6663	26.5402	36.2897	22	27.3316	27.1656	33.12	22	36.9105	36.9888	54.8253
	23	20.4063	20.0854	24.32	23	27.376	27.1056	36.2897	23	27.9206	27.6124	33.12	23	37.8439	37.8764	54.8253
	24	20.8862	20.3953	24.32	24	28.0729	27.6382	36.2897	24	28.4749	28.0256	33.12	24	38.7599	38.7198	54.8253
		Vmax-Ve	3.4338				8.21676				4.64508				16.0654
		%	14.1193				22.6421				14.025				29.3029

## Sheet: substrates
				SS characteristic
				VFA	SCOD	COD	density	pH	ALK	TOC	TS	TS	VS	VS	Pog	Nog	Pog	Nog	N-NH4+	P - PO43-	NO2, NO3
				mg/l	mg/l	g/l	g/cm3		mgCaCO3/l	mg/l	%	g/kg	%	g/kg	mg/l	mg/l	mg/l	mg/l	mg/l	mg/l	mg/l
				460.5	1433.5	43.325	1.017	6.54	750	407.8	4.17263	41.7263	77.6513	32.401	1125	5450	0.44	130	61.0928	95.8796	-
				511.75	1335.25	41.775	1.0145	6.57	800	527.5	3.33261	33.3261	76.4996	25.4943	976	3300	0.15	190	48.7126	83.2596	-
				292.333	654.667	33.1667	0.977	6.64	500	228.8	2.86511	28.6511	78.6084	22.5222	670	3650	0.2	150	13.4119	52.6969	-
				400.667	847.667	39.4333	0.9855	6.72	675	300.2	3.41711	34.1711	79.4527	27.1499	530	3150	0.02	150	15.3501	69.1681	0.018
															1157	3600	0.14	130	44.4567	78.7411	-
				796.667	1097.33	38.2	1.0085	6.7	950	466.9	3.78334	37.8334	70.8502	26.8051	1372	4700	0.05	220	123.428	276.661	-
				1547	3314.33	44.7	0.9785	5.87	925	963.9	4.07365	40.7365	76.3146	31.0879	1289.09	5100	0.24	180	63.3405	118.769	-
				1783	3340	44.5	0.9785	5.87	925	963.9	4.07365	40.7365	76.3146	31.0879	1289.09	5100	0.24	180	63.3405	118.769	-
				570	3759	45.6	1.0215	5.88	875	1008	3.48017	34.8017	70.4963	24.5339	1315.27	3500	0.08	200	53.9466	125.062
				2053	3957	51.5	1.008	5.97	1000	1185	4.20867	42.0867	75.7213	31.8686	1545	3500	0.53	260	11.2369	1529.48	-
				2180	4355	46	1.0165	5.76	1000	1280	4.09108	40.9108	68.6994	28.1055	860	3600	0.11	240	78.646	538.035	-
				1977	3834	58.3	1.0125	5.58	875	1536	4.08893	40.8893	73.9851	30.252	1250	2650	1.05	180	82.418	419.272
			average	1142.9	2538.89	44.2273	1.00164	6.19091	843.182	806.182	3.78063	37.8063	74.9631	28.3008	1114.87	3941.67	0.270833	184.167	54.9484	292.15
			SD	758.887	1444.91	6.66884	0.0177779	0.4378	152.517	439.544	0.442872	4.42872	3.52589	3.28545	300.961	901.976	0.28849	41.2219	32.3871	418.944
			confidence interval	448.465	853.871	3.94096	0.0105059	0.258719	90.13	259.749	0.261716	2.61716	2.08363	1.94154	177.853	533.024	0.170484	24.3601	19.1392	247.575
			max	1591.37	3392.76	48.1682	1.01214	6.44963	933.312	1065.93	4.04235	40.4235	77.0467	30.2423	1292.72	4474.69	0.441317	208.527	74.0876	539.725
			min	694.436	1685.02	40.2863	0.99113	5.93219	753.052	546.432	3.51892	35.1892	72.8794	26.3592	937.017	3408.64	0.10035	159.807	35.8092	44.5744
				BSG characteristic (avg. values)
				HRT 20 d	HRT 18 d
			COD	74846	70400
			SCOD	-	-
			VFA	1440	2750
			pH	5.74	6.64
			Alkalinity	1500	3000
			TS	226.9	220.8
			VS	217.2	213
			TN	1130	623
			TP	240	103
			NH4+ -N	18.6	27.2
			PO43- -P	6.8	43.4

## Sheet: biogas composition 
		R1				R2							R3				R4
		N2	CH4	CO2	H2S	N2	CH4	CO2	H2S				N2	CH4	CO2	H2S	N2	CH4	CO2	H2S
	10-03-2014	1.381	53.525	44.87	0.224	1.312	52.99	45.654	0.045			15-06-2014
	11-03-2014	1.935	52.993	44.854	0.219	1.746	50.949	47.224	0.081			16-06-2014	0.931	57.379	41.518	0.172	1.357	54.767	43.847	0.029
	12-03-2014	1.388	53.584	44.806	0.222	1.51	51.619	46.786	0.084			17-06-2014	0.839	57.329	41.667	0.165	1.382	54.628	43.907	0.083
	13-03-2014	0.758	53.974	45.026	0.242	1.2	51.729	46.986	0.085			18-06-2014	1.061	56.396	42.365	0.178	1.347	54.197	44.359	0.097
	14-03-2014											19-06-2014	0.81	56.646	42.484	0.061	1.278	54.234	44.408	0.079
	15-03-2014											20-06-2014
	16-03-2014											21-06-2014
	17-03-2014	1.145	54.633	44.021	0.201	0.989	52.747	46.185	0.079			22-06-2014
	18-03-2014	0.62	55.05	44.085	0.245	1.138	52.85	45.938	0.073			23-06-2014	0.531	56.483	42.819	0.167	1.198	54.456	44.252	0.094
	19-03-2014	1.669	54.663	43.424	0.244	1.688	52.817	45.429	0.065			24-06-2014	0.664	56.503	42.661	0.173	1.299	54.369	44.23	0.103
	20-03-2014	1.202	54.798	43.74	0.26	1.644	52.578	45.702	0.076			25-06-2014	1.018	56.493	42.328	0.161	1.448	54.207	44.233	0.112
	21-03-2014											26-06-2014	0.756	56.737	42.326	0.18	1.298	54.705	43.89	0.107
	22-03-2014											27-06-2014	0.636	57.13	42.032	0.202	1.604	54.78	43.52	0.096
	23-03-2014											28-06-2014
	24-03-2014	1.165	54.066	44.501	0.267	1.943	51.709	46.275	0.073			29-06-2014
	25-03-2014	0.955	54.114	44.649	0.282	1.719	51.755	46.449	0.076			30-06-2014
	26-03-2014	1.207	54.034	44.512	0.248	1.672	51.792	46.46	0.075			01-07-2014	0.891	57.574	41.363	0.172	1.286	55.325	43.289	0.1
	27-03-2014	1.021	53.798	44.939	0.242	1.857	51.399	46.677	0.067			02-07-2014	0.936	56.781	42.125	0.157	1.445	54.453	44.011	0.091
	28-03-2014	1.435	53.41	44.912	0.243	1.755	51.331	46.841	0.073			03-07-2014	0.857	56.431	42.554	0.158	1.453	54.259	44.185	0.104
	29-03-2014											04-07-2014	0.76	56.524	42.566	0.149	1.221	54.588	44.086	0.105
	30-03-2014											05-07-2014
	31-03-2014	1.769	53.522	44.497	0.212	1.766	51.375	46.787	0.072			06-07-2014
	01-04-2014											07-07-2014	0.614	57.471	41.764	0.151	0.946	55.413	43.509	0.132
	02-04-2014	0.91	54.087	44.746	0.257	1.484	52.05	46.42	0.076			08-07-2014	0.641	56.992	42.211	0.156	1.11	55.215	43.58	0.095
	03-04-2014	1.101	53.739	44.909	0.251	1.38	52.115	46.427	0.078			09-07-2014	0.992	57.589	41.269	0.15	1.054	55.24	43.585	0.12
	04-04-2014	1.518	53.731	44.52	0.231	1.336	51.762	46.82	0.082			10-07-2014	0.781	57.839	41.21	0.169	1.206	55.392	43.349	0.053
	05-04-2014											11-07-2014	0.676	57.514	41.652	0.158	1.174	55.361	43.333	0.132
	06-04-2014											12-07-2014
	07-04-2014	0.723	54.624	44.394	0.259	1.708	52.166	46.071	0.055			13-07-2014
	08-04-2014	1.125	53.865	44.754	0.256	1.768	52.002	46.161	0.069			14-07-2014	0.79056	56.9984	42.0587	0.1522	1.28152	54.533	44.0956	0.0902069
	09-04-2014	1.277	54.296	44.162	0.265	1.707	52.208	46.011	0.074			15-07-2014	0.79056	56.9984	42.0587	0.1522	1.28152	54.533	44.0956	0.0902069
	10-04-2014	1.212	53.937	44.586	0.264	1.535	52.17	46.219	0.076			16-07-2014	0.79056	56.9984	42.0587	0.1522	1.28152	54.533	44.0956	0.0902069
	11-04-2014	0.665	54.493	44.558	0.285	1.244	52.436	46.244	0.076			17-07-2014	0.79056	56.9984	42.0587	0.1522	1.28152	54.533	44.0956	0.0902069
	12-04-2014											18-07-2014	0.79056	56.9984	42.0587	0.1522	1.28152	54.533	44.0956	0.0902069
	13-04-2014											19-07-2014	0.79056	56.9984	42.0587	0.1522	1.28152	54.533	44.0956	0.0902069
	14-04-2014	1.241	53.984	44.498	0.277	1.128	52.789	46.009	0.074			20-07-2014	0.79056	56.9984	42.0587	0.1522	1.28152	54.533	44.0956	0.0902069
	15-04-2014	1.111	53.321	45.28	0.288	1.025	52.698	46.196	0.081			21-07-2014	0.79056	56.9984	42.0587	0.1522	1.28152	54.533	44.0956	0.0902069
	16-04-2014	0.647	55.098	44.018	0.237	1.295	53.005	45.634	0.066			avg	0.799667	56.9895	42.0508	0.159944	1.28367	54.7549	43.8652	0.0962222
	17-04-2014	0.732	55.855	43.186	0.227	1.352	53.151	45.444	0.053			SD	0.153051	0.488826	0.509631	0.0279042	0.159061	0.452685	0.37722	0.0249483
	avg	1.15046	54.1228	44.4787	0.248	1.49619	52.1612	46.2711	0.0724615			U	0.0599949	0.191616	0.199772	0.0109382	0.0599971	0.170751	0.142286	0.00941038
	SD	0.347938	0.639835	0.495536	0.0226822	0.273133	0.603444	0.476437	0.00949202			min	0.739672	56.7979	41.851	0.149006	1.22367	54.5842	43.7229	0.0868118
	U	0.13374	0.24594	0.190475	0.00871858	0.104987	0.231952	0.183133	0.00364855			max	0.859662	57.1811	42.2505	0.170883	1.34366	54.9257	44.0075	0.105633
	min	1.01672	53.8769	44.2883	0.239281	1.39121	51.9293	46.088	0.068813
	max	1.2842	54.3688	44.6692	0.256719	1.60118	52.3932	46.4542	0.0761101
